# Supplementary material
Source: Springer Nature journal article supplement (https://www.springermedizin.de/resource/supplementary/13601_2011_5_MOESM4_ESM.pdf/9677268)

Oral breathing

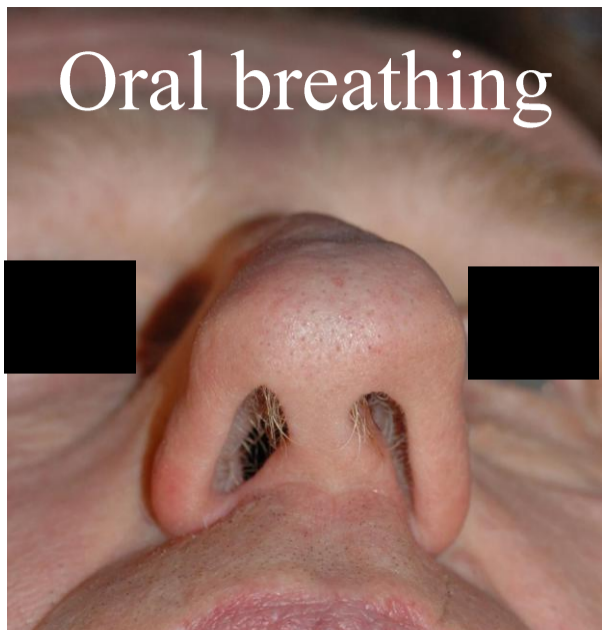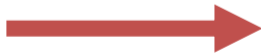

Nasal inspiration

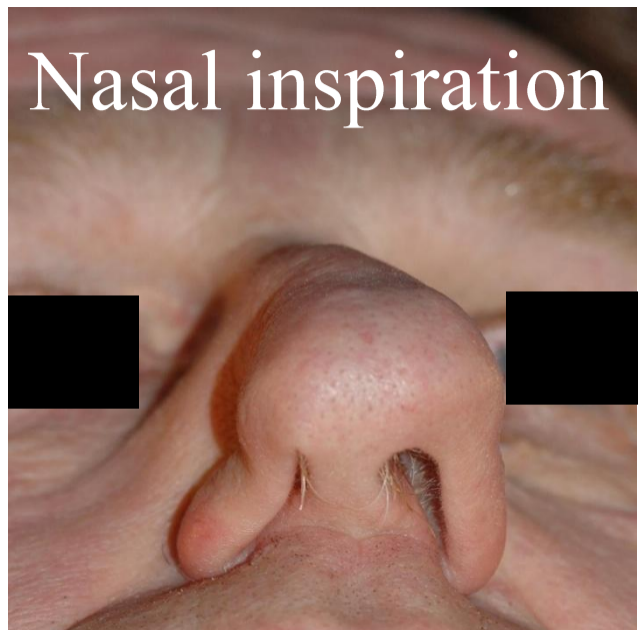

Supplement: MOESM4 [file 9677268]
